# Supplementary material
Source: PubMed Central journal article supplement (PMC4214537)
Supplement: ASN.2014010035_ASN2014010035SupplementaryData.pdf [file ASN.2014010035_ASN2014010035SupplementaryData.pdf]

## Supplemental Material

Table I OPCS codes for orthopaedic surgery requiring antibiotic prophylaxis

|     |                                                             |     |                                                                  |
|-----|-------------------------------------------------------------|-----|------------------------------------------------------------------|
| W15 | 1st Metatarsal Osteotomy, e.g. for Hallux Valgus            | W19 | Primary Open Reduction of Fracture with Intramedullary Fixation  |
| W37 | Total Hip Replacement, cemented                             | W20 | Primary Open Reduction of Fracture with Extra medullary Fixation |
| W38 | Total Hip Replacement, uncemented                           | W21 | Primary Open Reduction of Intra-articular Fracture with Fixation |
| W39 | Total Hip Replacement, other                                | W22 | Other Primary Open Reduction of Fracture                         |
| W94 | Total Hip Replacement, hybrid, cemented                     | W23 | Secondary Open Reduction of Fracture                             |
| W95 | Total Hip Replacement, hybrid, uncemented                   | W24 | Closed Reduction of Fracture with Internal Fixation              |
| W40 | Total Knee Replacement, cemented                            | W25 | Closed Reduction of Fracture with External Fixation              |
| W41 | Total Knee Replacement, uncemented                          | W46 | Prosthetic Replacement of Head of Femur, cemented                |
| W42 | Total Knee Replacement, other                               | W47 | Prosthetic Replacement of Head of Femur, uncemented              |
| W43 | Total Prosthetic Replacement of Other Joint, cemented       |     |                                                                  |
| W44 | Total Prosthetic Replacement of Other Joint, uncemented     |     |                                                                  |
| W49 | Humeral Head Replacement, cemented                          |     |                                                                  |
| W50 | Humeral Head Replacement, uncemented                        |     |                                                                  |
| W59 | Fusion of Toe Joint                                         |     |                                                                  |
| W60 | Fusion of Other Joint                                       |     |                                                                  |
| W96 | Total Shoulder Replacement, cemented                        |     |                                                                  |
| W97 | Total Shoulder Replacement, uncemented                      |     |                                                                  |
| O06 | Hybrid Total Shoulder Replacement, cemented humerus         |     |                                                                  |
| O07 | Hybrid Total Shoulder Replacement, cemented glenoid         |     |                                                                  |
| O08 | Hybrid Total Shoulder Replacement, both components cemented |     |                                                                  |
| O21 | Total Elbow Replacement, cemented                           |     |                                                                  |
| O22 | Total Elbow Replacement, uncemented                         |     |                                                                  |

| <b>GASTROINTESTINAL SURGERY</b>                                                  |
|----------------------------------------------------------------------------------|
| J02 Partial excision of liver                                                    |
| J03 Extirpation of lesion of liver                                               |
| J04 Repair of liver                                                              |
| J18 Excision of gall bladder and exploration of common bile duct                 |
| J27 Excision of bile duct                                                        |
| J28 Excision of lesion of bile duct                                              |
| J29 Connection of hepatic duct                                                   |
| J30 Connection of common bile duct                                               |
| J31 Open introduction of prosthesis into bile duct (if stones but not if cancer) |
| J32 Repair of bile duct                                                          |
| J33 Incision of bile duct                                                        |
| J34 Plastic repair of sphincter of Oddi using duodenal approach                  |
| J35 Incision of sphincter of Oddi using duodenal approach                        |
| J36 Other operations on ampulla of Vater using duodenal approach                 |
| J55 Total excision of pancreas                                                   |
| J56 Excision of head of pancreas                                                 |
| J57 Other partial excision of pancreas                                           |
| J58 Extirpation of lesion of pancreas                                            |
| J59 Connection of pancreatic duct                                                |
| J60 Other open operations on pancreatic duct                                     |
| J61 Open drainage of lesion of pancreas                                          |
| UPPER GI                                                                         |
| G01 Excision of oesophagus and stomach (oesophagogastrectomy)                    |
| G27 Total excision of stomach (total gastrectomy)                                |
| G28 Partial excision of stomach (partial gastrectomy)                            |
| G31 Connection of stomach to duodenum                                            |
| G32 Connection of stomach to transposed jejunum                                  |
| G33 Other connection of stomach to jejunum                                       |
| G35 Operations on ulcer of stomach                                               |
| G36 Other repair of stomach                                                      |
| G38.5 Incision of stomach not elsewhere classified                               |
| G41 Repair of perforation of pylorus                                             |
| LOWER GI                                                                         |
| H04 Total excision of colon and rectum                                           |
| H05 Total excision of colon                                                      |
| H06 Extended excision of right hemicolon                                         |
| H07 Other excision of right hemicolon                                            |
| H08 Excision of transverse colon                                                 |
| H09 Excision of left hemicolon                                                   |
| H10 Excision of sigmoid colon                                                    |
| H11 Other excision of colon                                                      |
| H12 Extirpation of lesion of colon                                               |
| H13 Bypass of colon                                                              |
| H14 Exteriorisation of caecum                                                    |
| H15 Other exteriorisation of colon                                               |
| H16 Incision of colon                                                            |
| H29 Subtotal excision of colon and rectum                                        |
| H33 Excision of rectum                                                           |
| G49 Excision of duodenum                                                         |
| G50 Open extirpation of lesion of duodenum                                       |
| G52 Operations on ulcer of duodenum                                              |
| G53 Other open operations on duodenum                                            |
| G58 Excision of jejunum                                                          |
| G59 Extirpation of lesion of jejunum                                             |
| G60 Artificial opening into jejunum                                              |

|                                                                           |
|---------------------------------------------------------------------------|
| G63 Other open operations on jejunum                                      |
| G68 Allotransplantation of ileum                                          |
| G70 Open extirpation of lesion of ileum                                   |
| G74 Creation of artificial opening into ileum                             |
| G75 Attention to artificial opening into ileum                            |
| G78 Other open operations on ileum                                        |
|                                                                           |
| <b>GYNAECOLOGICAL SURGERY</b>                                             |
| Q07 Abdominal excision of uterus                                          |
| Q08 Vaginal excision of uterus                                            |
| Q09 Other excision of uterus                                              |
| Q074 laparoscopic total hysterectomy                                      |
| Q075 - laparoscopic subtotal hysterectomy                                 |
|                                                                           |
| <b>UROLOGICAL SURGERY</b>                                                 |
| M651 TURP                                                                 |
| M421 TURBT                                                                |
| M091 Fragmentation of kidney stone                                        |
| M271 Fragmentation of ureteric stone                                      |
| M273 Fragmentation of ureteric stone                                      |
| M094 Removal of kidney stone                                              |
| M263 Removal of ureteric stone                                            |
| M343 Radical cystectomy                                                   |
| M612 Laparoscopic radical prostatectomy M612 AND Y752 ( need to include)  |
| Y752 Laparoscopic radical prostatectomy                                   |
|                                                                           |
| <b>VASCULAR SURGERY</b>                                                   |
| L16 Extraanatomic bypass of aorta                                         |
| L18 Emergency replacement of aneurysmal segment of aorta                  |
| L19 Other replacement of aneurysmal segment of aorta                      |
| L20 Other emergency bypass of segment of aorta                            |
| L21 Other bypass of segment of aorta                                      |
| L22 Attention to prosthesis of aorta                                      |
| L23 Plastic repair of aorta                                               |
| L25 Other open operations on aorta                                        |
| L28 Transluminal insertion of stent graft for aneurysmal segment of aorta |
| L29 Reconstruction of carotid artery                                      |
| L30 Other open operations on carotid artery                               |
| L37 Reconstruction of subclavian artery                                   |
| L38 Other open operations on subclavian artery                            |
| L41 Reconstruction of renal artery                                        |
| L42 Other open operations on renal artery                                 |
| L45 Reconstruction of other visceral branch of abdominal aorta            |
| L46 Other open operations on other visceral branch of abdominal aorta     |
| L48 Emergency replacement of aneurysmal iliac artery                      |
| L49 Other replacement of aneurysmal iliac artery                          |
| L50 Other emergency bypass of iliac artery                                |
| L51 Other bypass of iliac artery                                          |
| L52 Reconstruction of iliac artery                                        |
| L53 Other open operations on iliac artery                                 |
| L56 Emergency replacement of aneurysmal femoral artery                    |
| L57 Other replacement of aneurysmal femoral artery                        |
| L58 Other emergency bypass of femoral artery                              |
| L59 Other bypass of femoral artery                                        |
| L60 Reconstruction of femoral artery                                      |
| L62 Other open operations on femoral artery                               |
| L65 Revision of reconstruction of artery                                  |
| L68 Repair of other artery                                                |

|                                                    |
|----------------------------------------------------|
| L70 Other open operations on other artery          |
| L75 Other arteriovenous operations                 |
| L77 Connection of vena cava or branch of vena cava |
| L79 Other operations on vena cava                  |
|                                                    |

Table II: Cochrane EPOC (Effective Practice and Organisation of Care) Risk of Bias Criteria for Interrupted Time Series studies and analysis plan for addressing each risk

| Cochrane Risk of Bias Criteria                                                                               | Analysis Plan                                                                                                                                                                                                                                                                                                                                                                                            |
|--------------------------------------------------------------------------------------------------------------|----------------------------------------------------------------------------------------------------------------------------------------------------------------------------------------------------------------------------------------------------------------------------------------------------------------------------------------------------------------------------------------------------------|
| <p><b>Was the intervention independent of other changes?</b></p> <p>Low</p>                                  | <p>This was a planned intervention and analysis. The stimulus for the analysis was concern about possible unintended consequences of the policy change; The policy was intended to reduce <i>C difficile</i> infection.</p> <p>Multivariate analysis was used to adjust for possible changes in demography, co-morbidity or risk factors for AKI</p>                                                     |
| <p><b>Was the shape of the intervention effect pre-specified?</b></p> <p>Low</p>                             | <p>The point of analysis was the point of intervention (introduction of the new antibiotic policy in October 2008). The anticipated shape of the intervention effect was an increase in post-operative renal impairment after the intervention</p>                                                                                                                                                       |
| <p><b>Was the intervention unlikely to affect data collection?</b></p> <p>Low</p>                            | <p>Analysis compared frequency of sampling for renal function tests in the risk window in the pre- and post-intervention phases in order to test whether the intervention may have affected data collection. There were slightly greater numbers of tests performed in the pre-intervention period which would have biased results towards the null as it may have led to cases of AKI being missed.</p> |
| <p><b>Was knowledge of the allocated interventions adequately prevented during the study?</b></p> <p>Low</p> | <p>The primary outcome (acute kidney injury) was objectively defined from serum creatinine tests</p>                                                                                                                                                                                                                                                                                                     |
| <p><b>Were incomplete outcome data adequately addressed?</b></p> <p>Low</p>                                  | <p>We included information about frequency of renal function tests in the pre- and post-intervention periods and were able to identify any patients with missing data that prevented assessment of post-operative renal impairment. We have only drawn conclusions from groups where there was a low incidence of missing data.</p>                                                                      |
| <p><b>Was the study free from selective outcome reporting?</b></p> <p>Low</p>                                | <p>Our study only has one outcome and this was derived from routine data. There was a significant amount of missing data as serum creatinine testing was not done. We have reported the frequency of missing data.</p>                                                                                                                                                                                   |
| <p><b>Was the study free from other risks of bias?</b></p> <p>Low</p>                                        | <p>We had 24 monthly time points pre- and post-intervention so were able to adjust for seasonal variation.</p>                                                                                                                                                                                                                                                                                           |

Table III. Multivariate Analysis of included versus excluded patients

| <b>Orthopaedic Surgery</b>        |          |            |          |               |
|-----------------------------------|----------|------------|----------|---------------|
| <b>Variable</b>                   | <b>B</b> | <b>Sig</b> | <b>B</b> | <b>95% CI</b> |
| <b>Age at surgery</b>             | 0.07     | <0.001     | 1.08     | 1.07, 1.08    |
| <b>Gender</b>                     | -0.40    | <0.001     | 0.67     | 0.59, 0.76    |
| <b>Charlson comorbidity Index</b> | 0.11     | 0.04       | 1.12     | 1.01, 1.24    |
| <b>Urology</b>                    |          |            |          |               |
| <b>Age at surgery</b>             | 0.03     | <0.001     | 1.03     | 1.02, 1.03    |
| <b>Gender</b>                     | -0.28    | 0.02       | 0.76     | 0.60, 0.96    |
| <b>Charlson comorbidity Index</b> | -0.03    | 0.43       | 0.98     | 0.92, 1.04    |
| <b>Vascular</b>                   |          |            |          |               |
| <b>Age at surgery</b>             | 0.06     | <0.001     | 1.06     | 1.05, 1.08    |
| <b>Gender</b>                     | -0.25    | 0.28       | 0.78     | 0.50, 1.22    |
| <b>Charlson comorbidity Index</b> | 0.02     | 0.75       | 1.03     | 0.89, 1.19    |
| <b>Gastrointestinal</b>           |          |            |          |               |
| <b>Age at surgery</b>             | 0.02     | <0.001     | 1.02     | 1.01, 1.02    |
| <b>Gender</b>                     | -0.53    | <0.001     | 0.59     | 0.50, 0.70    |
| <b>Charlson comorbidity Index</b> | 0.49     | <0.001     | 1.64     | 1.49, 1.80    |
| <b>Gynaecology</b>                |          |            |          |               |
| <b>Age at surgery</b>             | 0.02     | <0.001     | 1.02     | 1.01, 1.04    |
| <b>Gender</b>                     | -        | -          | -        | -             |
| <b>Charlson comorbidity Index</b> | 0.28     | <0.001     | 1.32     | 1.15, 1.52    |
